# Supplementary material
Source: PubMed Central journal article supplement (PMC3806636)
Supplement: NIHMS517960-supplement-02.pdf [file NIHMS517960-supplement-02.pdf]

**Supplemental Figure 1**

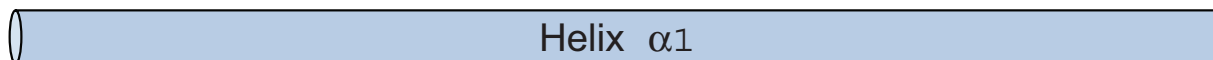

SACE MNEAD-----VTKFVNNARKTLTDAQLLCSANLRIVDIKKKLSSWQLSISKLNFLIV 53  
 KLTH MNEAV-----IEKLENSRKFLTGAKLICQESNDHLTTTKLRIREWQKFQSKLHFVLD 53  
 KLLA MSDAATTIPSDEIDKLWNKARNQLVEAQVECEESLKILSKVRTEMDSSQKSRFKLKFILN 60

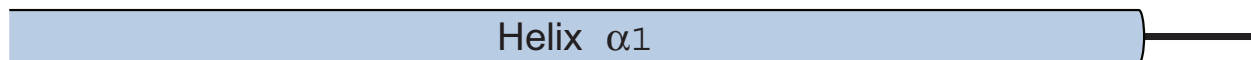

SACE GLRQQGKFLYTIK-EGIGTKLIQKQWNQAVLVVLVDEMKYWQYEITSKVQRLDGI VNEL 112  
 KLTH CIQQQTKFLSEILLREGIGRNLI EEEWSQTVLVRLVNDMKFWQNEITKMMNKLDNITNEI 113  
 KLLA CLVNQVEFFKNIMLEKCI STELIDNEWSKLVLVEIVNDVSYWQNEITTKMKILOGTKYDL 120

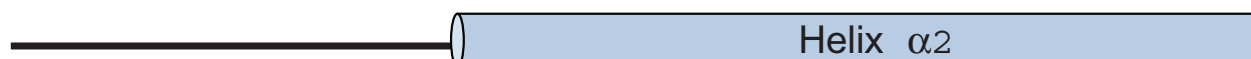

SACE SISEKDDTDPSKLGDI SRDNVLLNDKLKEVPVIERQIENIKLQYENMVRKVNKELIDT 172  
 KLTH DQQHN-----SKLGD FISRSSHILDSKLINEIPTIRKQVENITRQYQTMLAKVQSOLVES 168  
 KLLA TDDHS-----SLSD FICMDHVDILQQKIDEIPIIKQQVTNIRQHYKSIKDRIENQLVAV 174

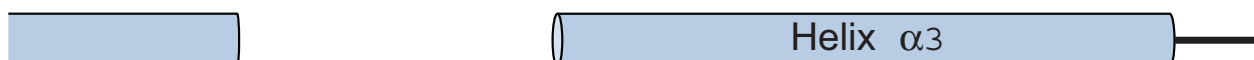

SACE KLTDVTQKFQSKFGIDNLMETN--VAEQFSRELTDLKDLAEIMNSLTQHFDKTL LLLQDK 230  
 KLTH RMKGLRDEFSSKFGDQCRENLK--LNEEFTNEADQLEQELADFLKSFTDHF DKSALSSR 226  
 KLLA KLKCLR TYFDSHF SRDSKNNL FKLLES DYVTELNEFENELADFLRSITDHF DKTILKEQ 234

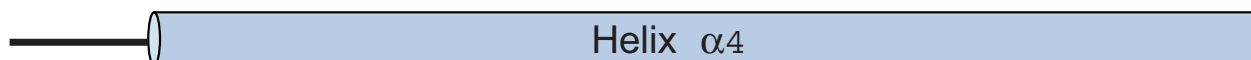

SACE KIDNDEREELFKVVQGD DKELYNIFKTLHEVIDDVKTI LNLGQFLQAKIKEKTELHSEV 290  
 KLTH SVSPEDAQNLF EIVERDDKDLAAINSL LQDAAIDVASFVRKVNML LDERDADKAKMQATL 286  
 KLLA QIPLPDLKELFQIVKKDDTQLENIRELVFETGLEVKAFS KKVNETISEIMDKIGGFHLLA 294

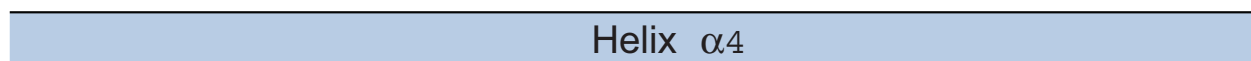

SACE SEIINDFN RNLEYLLIFKDISN LIDSFKN SCTQDIQTTKELCEFYDNFEESYGNLVLEAK 350  
 KLTH SKLLTEL RKHEEYISVFEGISALIQKFKASCLEDIRQTRNLLDFYANFERSYHNLLKEVK 346  
 KLLA SKIVTELEKCEEYLSIFQKIANLVFVYKESC IKKIEQVQQLCEFYDKFKLGYKNLLRERD 354

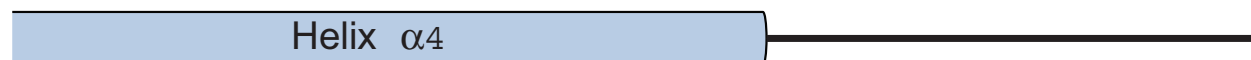

SACE RRKDVANRMKTILK DCEKQLQN LDAQDQEERQNFIAENGTYLPETIWP GKIDDFSSLYTL 410  
 KLTH RRKETAAKLSQILK SCETQLEQINTADLRERQMFLLENGNYLPETIWPDEIGSL SPLYTL 406  
 KLLA RRKATALQMEKILKECQEKLQALS DADLDQRQQFLLENGDYLPENIWP GYIDDMESMYSF 414

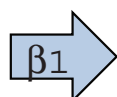

SACE NYNVKNP-- 417  
 KLTH NYEVRKV-- 413  
 KLLA EYSIHNVPN 423

**Supplemental Figure 2**

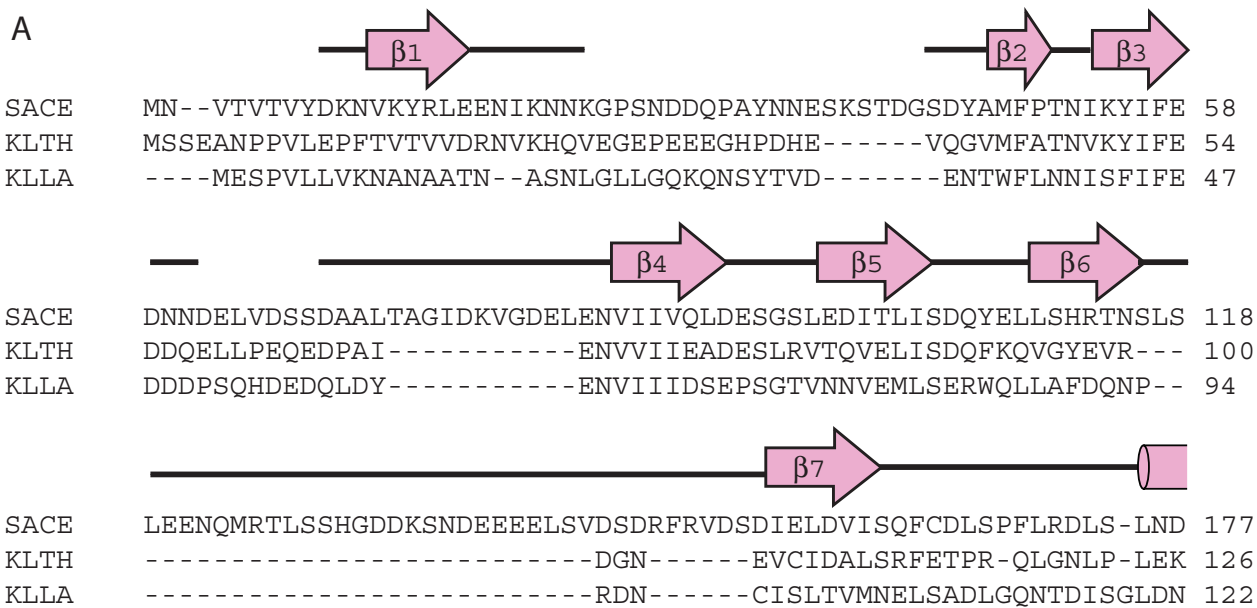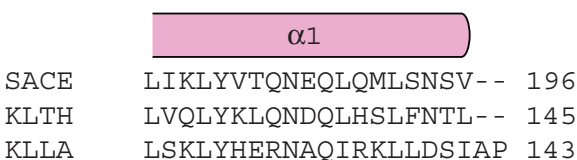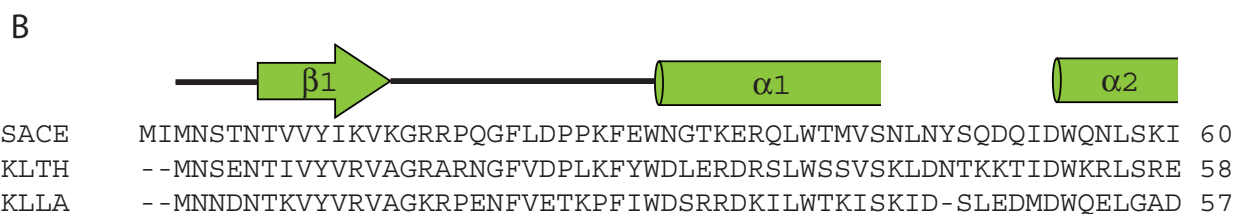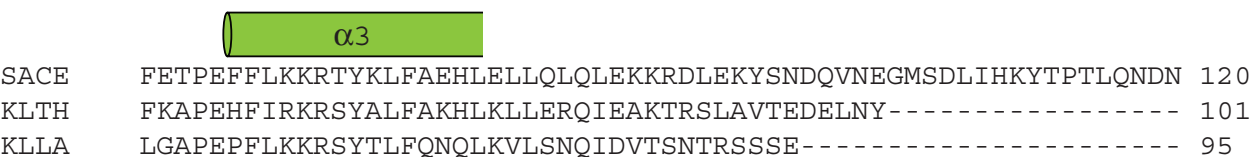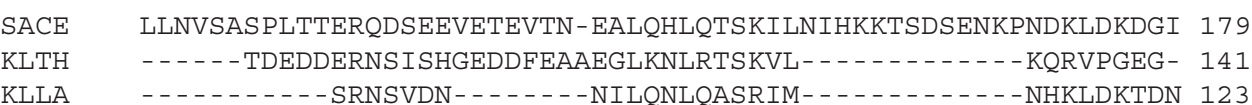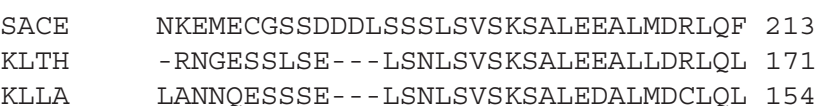

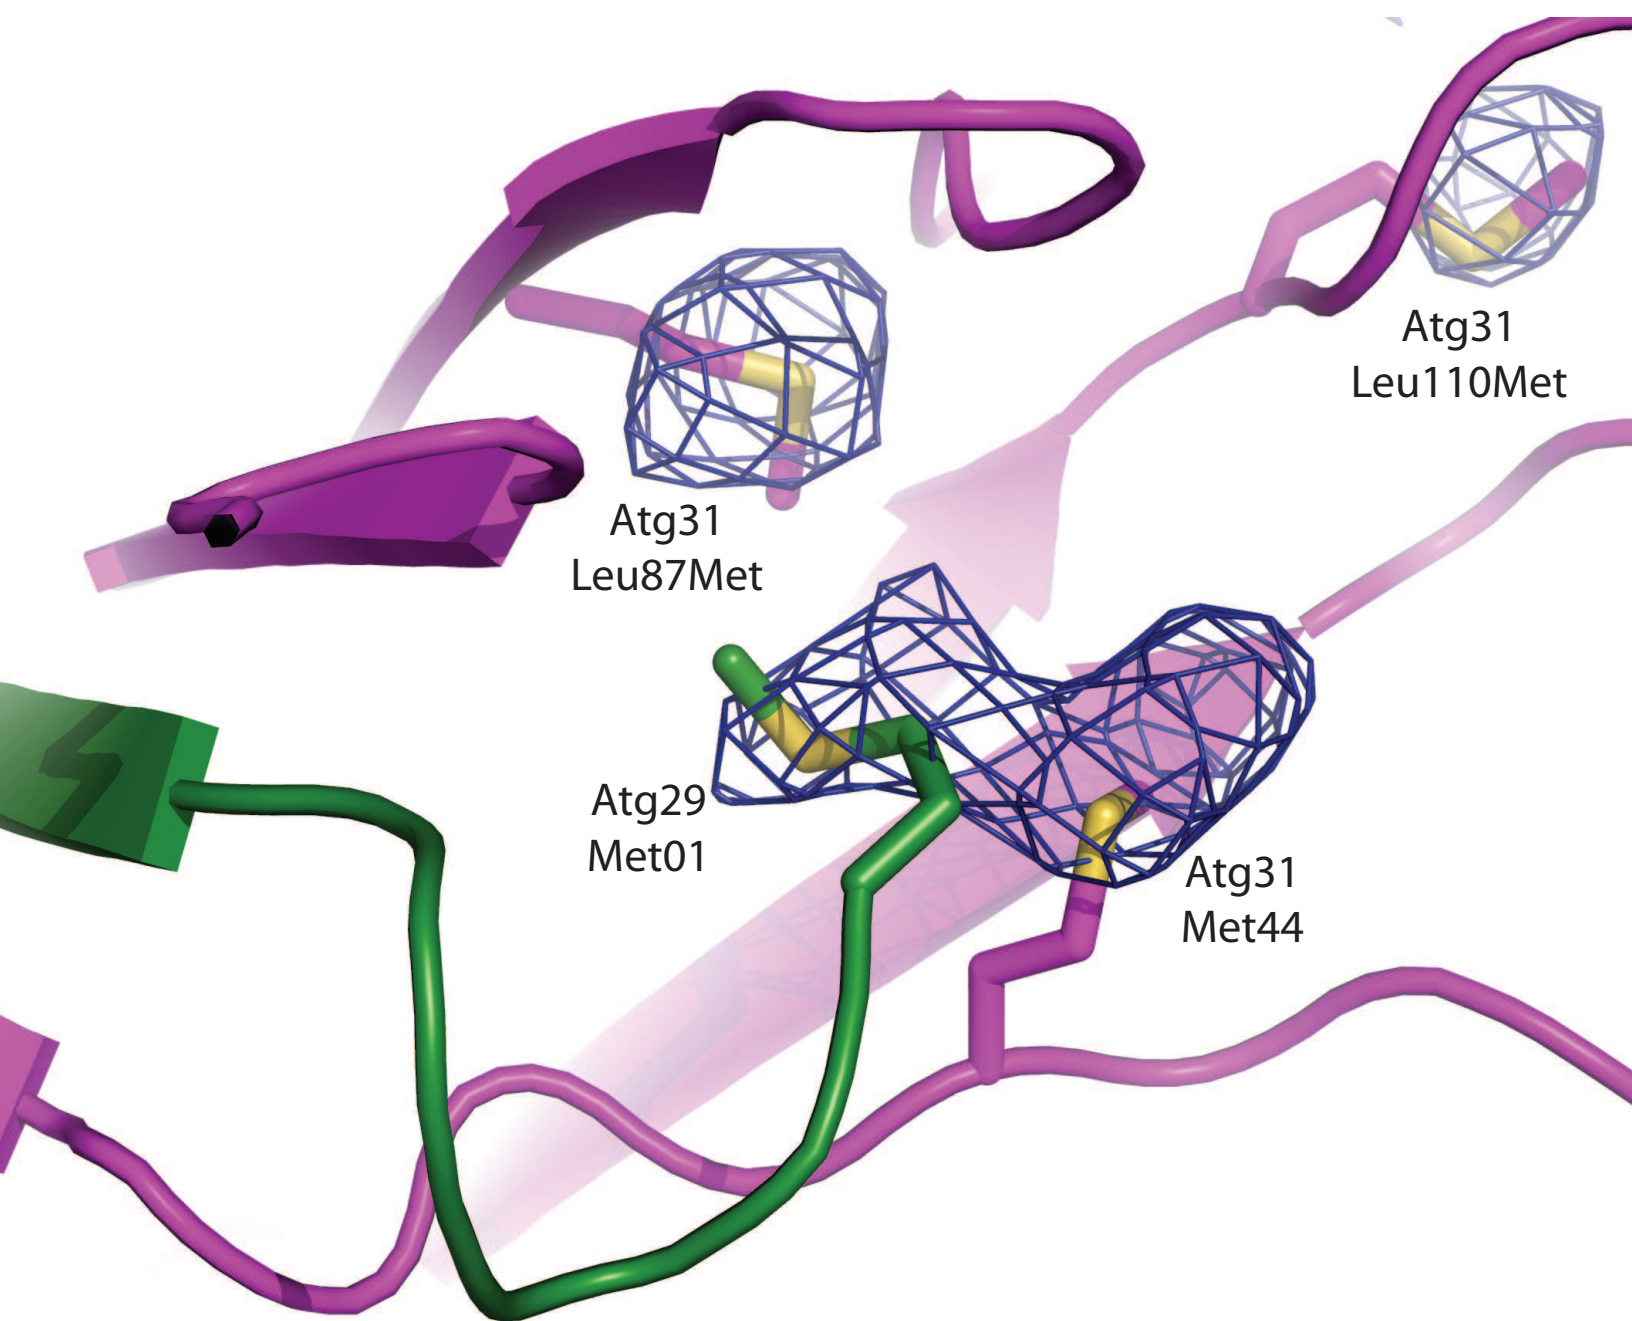

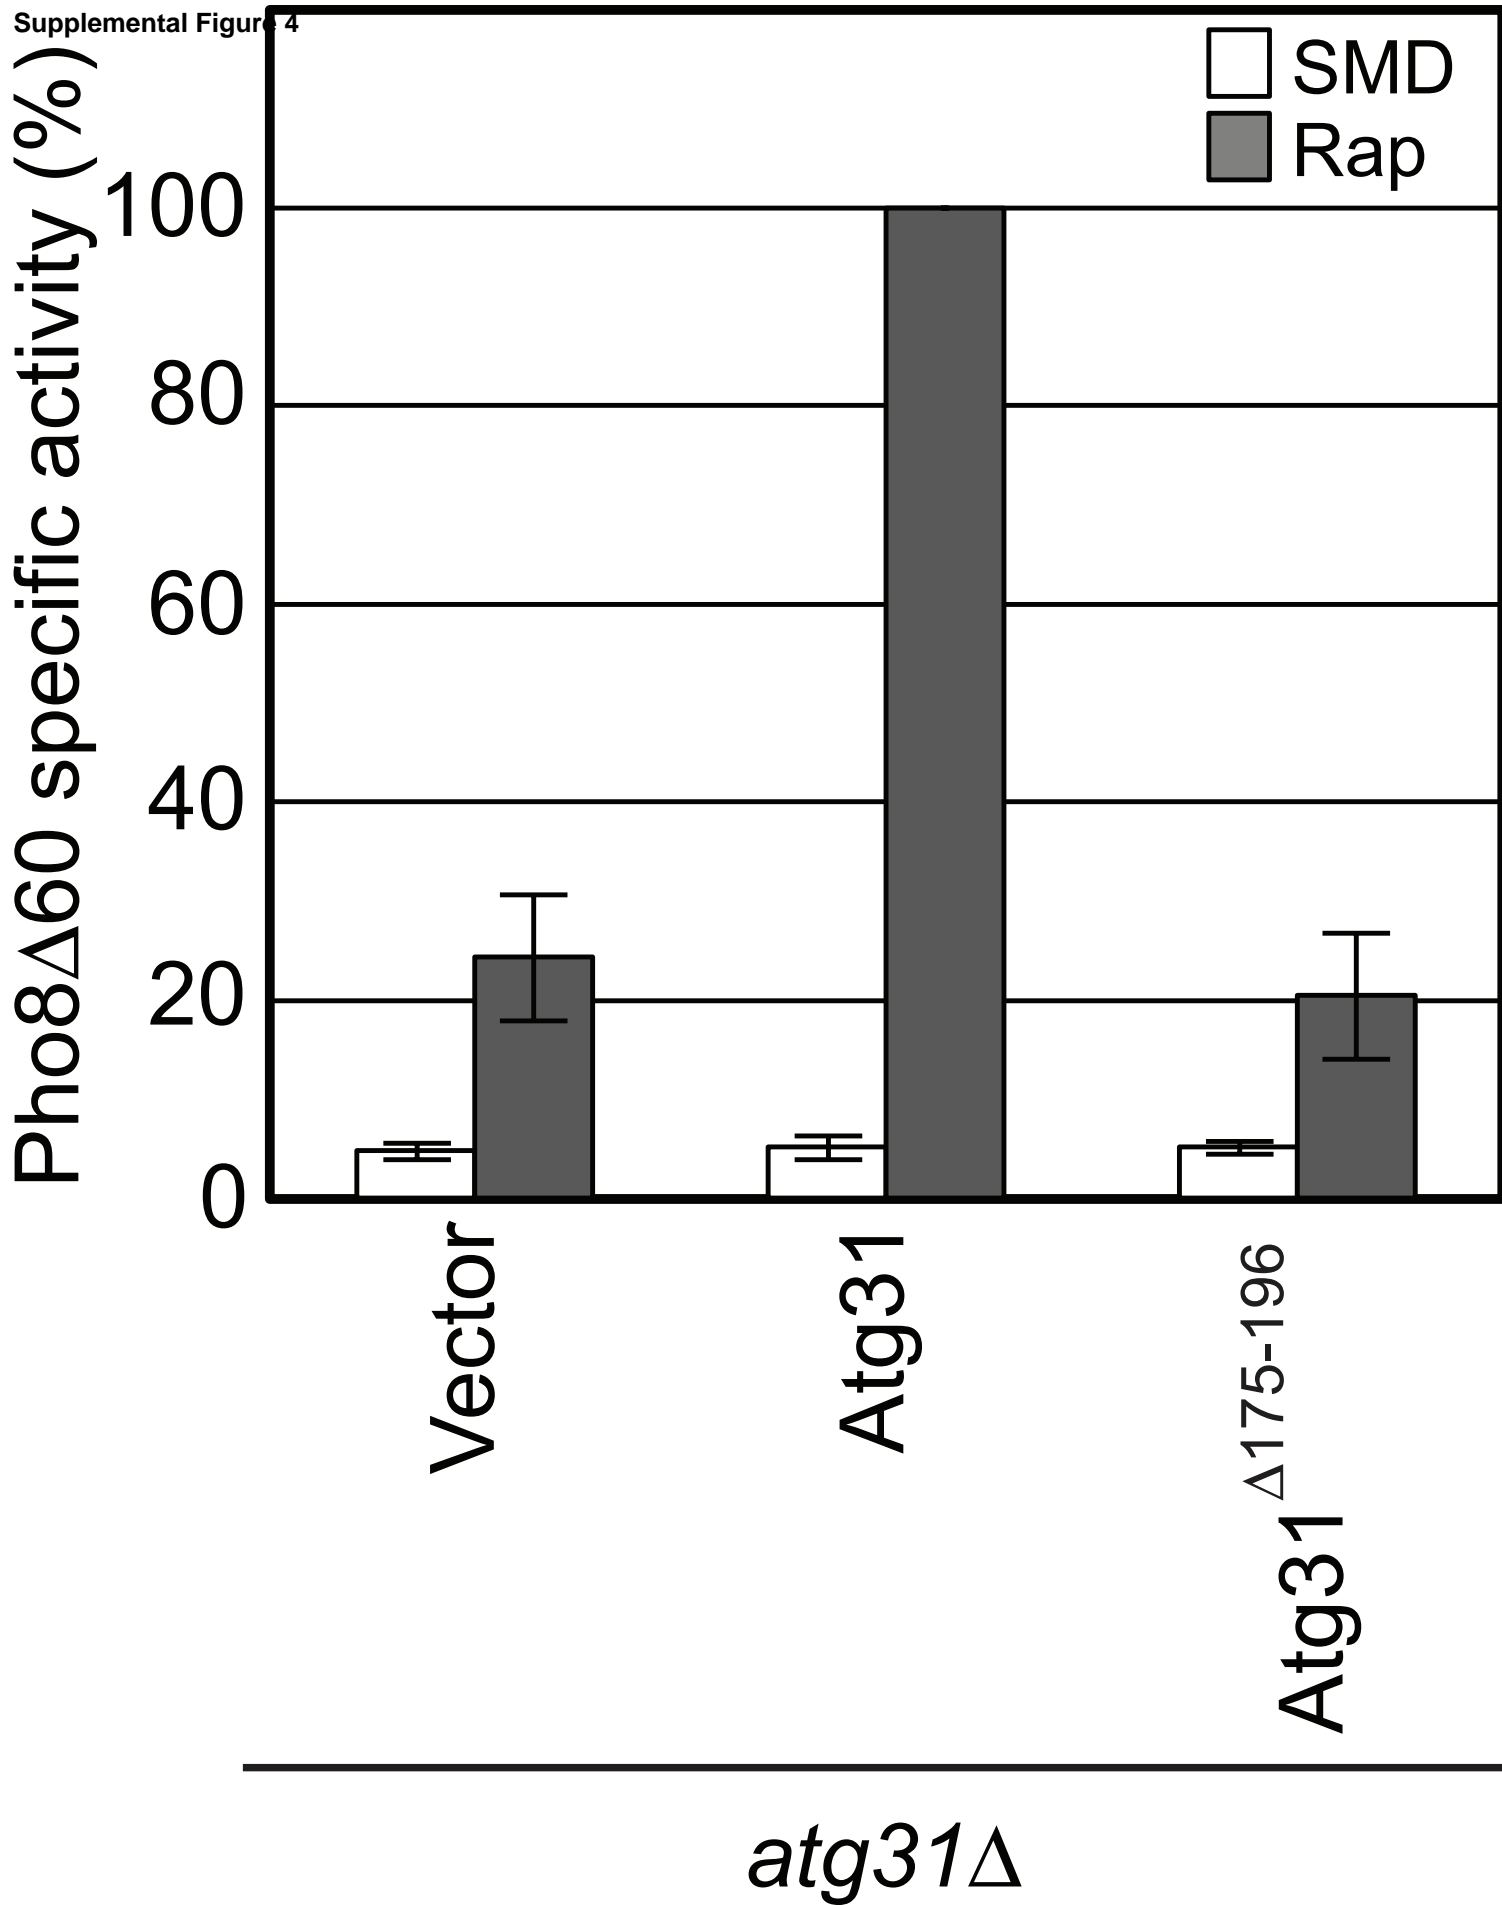

Figure S4
